# Supplementary material for: A Genome Wide Comparison to Identify Markers to Differentiate the Sex of Larval Stages of Schistosoma haematobium, Schistosoma bovis and their Respective Hybrids
Source: PLoS Negl Trop Dis. 2016 Nov 18;10(11):e0005138. doi: 10.1371/journal.pntd.0005138 (PMC5115654; doi:10.1371/journal.pntd.0005138)
Supplement: S1 File — (FASTA) [file pntd.0005138.s003.fasta]

>WSh1_ref
GCGTTCCGTTTAAAACATCGAGAATATATTTCGCTTTCTAAGTTTATTTAAAATAAATGT
AATTTAATTGTTTCGAAGTTTTCATAGATCACTTCATTTGGACTAGAAAACAGAAGGCCA
TCAAATGCCCTGGTACGGTCGAGGGTGGGGAGAGTCATTCCCCCTCTCGAAATTCCCTCA
CATGGAC
>WSh1_Sh
GCGTTCCGTTTAAAACATCGAGAATATATTTCGCTTTCTAAGTTTATTTAAAATAAATGT
AATTTAATTGTTTCGAAGTTTTCATAGATCACTTCATTTGGACTAGAAAACRGAAGGCCA
TCAAATGCCCTGGTACGGTCGAGGGTGGGGAGAGTCATTCCCCCTCTCGAAATTCCCTCA
CATGGAC
>WSh1_hybrid
GCGTTCCGTTTAAAACATCGAGAATATATTTCGCTTTCTAAGTTTATTTAAAATAAATGT
AATTTAATTGTTTCGAAGTTTTCATAGATCACTTCATTTGGACTAGAAAACRGAAGGCCA
TCAAATGCCCTGGTACGGTCGAGGGTGGGGAGAGTCATTCCCCCTCTCGAAATTCCCTCA
CATGGAC


>WSh2_ref
GAATCGATGACACTGGCGTAGGTGTATACAGAATTTATCTTTCCTTCTTTTTTATATATT
ACTATCAGTGAAGTAACTATTACTATGAATTTAGTGTTTGTTATTTTGTGTTAATGAAGT
GTGGCAACCTGAACCTAAAATGTAGCTGACAGACAGACTGACATGGGTCTCACCGGATGA
AACCATGGAGAAACAGGTAGATCATATTTGTATCAATAAACAATTCCGAAGGACAGTGG
>WSh2_Sh
GAATCGATGACACTGGCGTAGGTGTATACAGAATTTATCTTTCCTTCTTTTTTATATATT
ACTATCAGTGAAGTAACTATTACTATGAATTTAGTGTTTGTTATTTTGTGTTAATGAAGT
GTGGCAACCTGAACCTAAAATGTAGCTGACAGACAGACTGACATGGGTCTCACCGGATGA
AACCATGGAGAAACAGGTAGATCATATTTGTATCAATAAACAATTCCGAAGGACAGTGG
>WSh2_hybrid
GAATCGATGACACTGGCGTAGGTGTATACAGAATTTATCTTTCCTTCTTTTTTATATATT
ACTATCAGTGAAGTAACTATTACTATGAATTTAGTGTTTGTTATTTTGTGTTAATGAAGT
GTGGCAACCTGAACCTAAAATGTAGCTGACAGACAGACTGACATGGGTCTCACCGGATGA
AACCATGGAGAAACAGGTAGATCATATTTGTATCAATAAACAATTCCGAAGGACAGTGG


>WShSb1_ref
CCACTAGAGTCGTCGTCGTGTATTGGGGTTAATAAATCATCACCTATACCAGTCTTTGTG
TTCTTGGGCAGGGGCAATGTTATGTATGCTCTTTGTAGGCAAGAACCATGCGAAGATGTC
GTACGACTAGTGGAATGCTTTAAAGATATAATGTTCGGTACTTATGATACACGCACTTTT
GTTATGGATTCGGCAGC
>WShSb1_Sh
CCACTAGAGTCGTCGTCGTGTATTGGGGTTAATAAATCATCACCTATACCAGTCTTTGTG
TTCTTGGGCAGGGGCAATGTTATGTATGCTCTTTGTAGGCAAGAACCATGCGAAGATGTC
GTACGACTAGTGGAATGCTTTAAAGATATAATGTTCGGTACTTATGATACACGCACTTTT
GTTATGGATTCGGCAGC
>WShSb1_hybrid
CCACTAGAGTCGTCGTCGTGTATTGGGGTTAATAAATCATCACCTATACCAGTCTTTGTG
TTCTTGGGCAGGGGCAATGTTATGTATGCTCTTTGTAGGCAAGAACCATGCGAAGATGTC
GTACGACTAGTGGAATGCTTTAAAGATATAATGTTCGGTACTTATGATACACGCACTTTT
GTTATGGATTCGGCAGC
>WShSb1_Sb
CCACTAGAGTCGTCGTCGTGTTTTGGGGTTAATAAATCATCCCCTATACCAGTCTTTGTG
TTCTTGGGCAGAGGCAATGTTATGTATTCTCTTTGTCGGCAGGAACCATGCGAAGATGTC
GTACGACTAGTGGAATGCTTTAAAGATATAATGTTCGGTACTTATGATACACGCACTTTT
GTTATGGATTCGGCAGC

>WShSb2_ref
GTTGAAATTCGCTGCTGGATGAGCTAGAACAAGCGACTCTCCAGACGTCCTTTAAGAGAA
GACCTGAAATATTCTTAAAGACTAAGGATTGTATTTACCATGATATATCAATTTCTTTTT
CCCCTTTCATCGATATCATATCTAGGTTCCTGTCTGAAAGTATTGGTGAGTCACCCTTAC
TAGACACAGAAGCTTGTTTTGTAAGAGCTTCAATTCCGTCCAAAACCATT
>WShSb2_Sh
GTTGAAATTCGCTGCTGGATGAGCTAGAACAAGCGACTCTCCAGACGTCCTTTAAGAGAA
GACCTGAAATATTCTTAAAGACTAAGGATTGTATTTACCATGATATATCAATTTCTTTTT
CCCCTTTCATCGATATCATATCTAGGTTCCTGTCTGAAAGTATTGGTGAGTCACCGTTAC
TAGACACAGAAGCTTGTTTTGTAAAAGCTTCAATTCCGTCCAAAACCATT
>WShSb2_hybrid
GTTGAAATTCGCTGCTGGATGAGCTAGAACAAGCGACTCTCCAGACGTCCTTTAAGAGAA
GACCTGAAATATTCTTAAAGACTAAGGATTGTATTTACCATGATATATCAATTTCTTTTT
CCCCTTTCATCGATATCATATCTAGGTTCCTGTCTGAAAGTATTGGTGAGTCACCGTTAC
TAGACACAGAAGCTTGTTTTGTAAAAGCTTCAATTCCGTCCAAAACCATT
>WShSb2_Sb
GTTGAAATTCGCTGCTGGATGAGCTAGAACAAGCGACTCTCCAGACGTCCTTTAAGAGAA
GACCTGRAATATTCTTAAAGACTAAGGATTGTATTTACCATGATATATCAAYTTCTTTTT
CCMCTTTCATCGATATCATATCTAGGTTCCTGTCTGAAAGTATTGGTGAGTCACCSTTAC
TAGAMACAGAAKCTTGTTTTGTAAAAGCTTCAATTCCGTCCAAAACCATT

>WShSb3_ref
GGTGGTCAGGCATTGATTCTTTCATGGTTTCGATAAAATTCAATGATGTACACAGCCCTA
AACTGAGAACCATATACTTACTTTGGTGCCTTCAAGCTCAACTCTTCTCAAACTGCTACA
AACAGCTAGAGAATCTATATAATAGGCAGATATTTAATCTCAATTTTGTAATAACCTGAA
GCGCCTAAACATG
>WShSb3_Sh
GGTGGTCAGGCATTGATTCTTTCATGGTTTCGATAAAATTCAATGATGTACACAGCCCTA
AACTGAGAACCATATACTTACTTTGGTGCCTTCAAGCTCAACTCTTCTCAAACTGCTACA
AACAGCTAGAGAATCTATATAATAGGCAGATATTTAATCTCAATTTTGTAATAACCTGAA
GCGCCTAAACATG
>WShSb3_hybrid
GGTGGTCAGGCATTGATTCTTTCATGGTTTCGATAAAATTCAATGATGTACACAGCCCTA
AACTGAGAACCATATACTTACTTTGGTGCCTTCAAGCTCAACTCTTCTCAAACTGCTACA
AACAGCTAGAGAATCTATATAATAGGCAGATATTTAATCTCAATTTTGTAATAACCTGAA
GCGCCTAAACATG
>WShSb3_Sb
GGTGGTCAGGCATTGATTCTTTCATGGTTTCGATAAAATTCAATGATGTACACAGCCCTA
AACTGAGAACCATATACTTACTTTGGTGCCTTCAAGCTCAACTCTTCTCAAACTGCTACA
AACAGCTAGAGAATCTATATAATAGGCAGATATTTAATCTCAATTTTGTAATAACCTGAA
GCGCCTAAACATG
